# Supplementary material
Source: PubMed Central journal article supplement (PMC4847640)

**ADVANCED  
HEALTHCARE  
MATERIALS**

Supporting Information

for *Adv. Healthcare Mater.*, DOI: 10.1002/adhm. 201300169

**Microwaving Blood as a Non-Destructive Technique for  
Haemoglobin Measurements on Microlitre Samples**

*Toby H. Basey-Fisher,\* Nadia Guerra, Chiara Triulzi,  
Andrew Gregory, Stephen M. Hanham, Molly M. Stevens,  
Stefan A. Maier, and Norbert Klein*

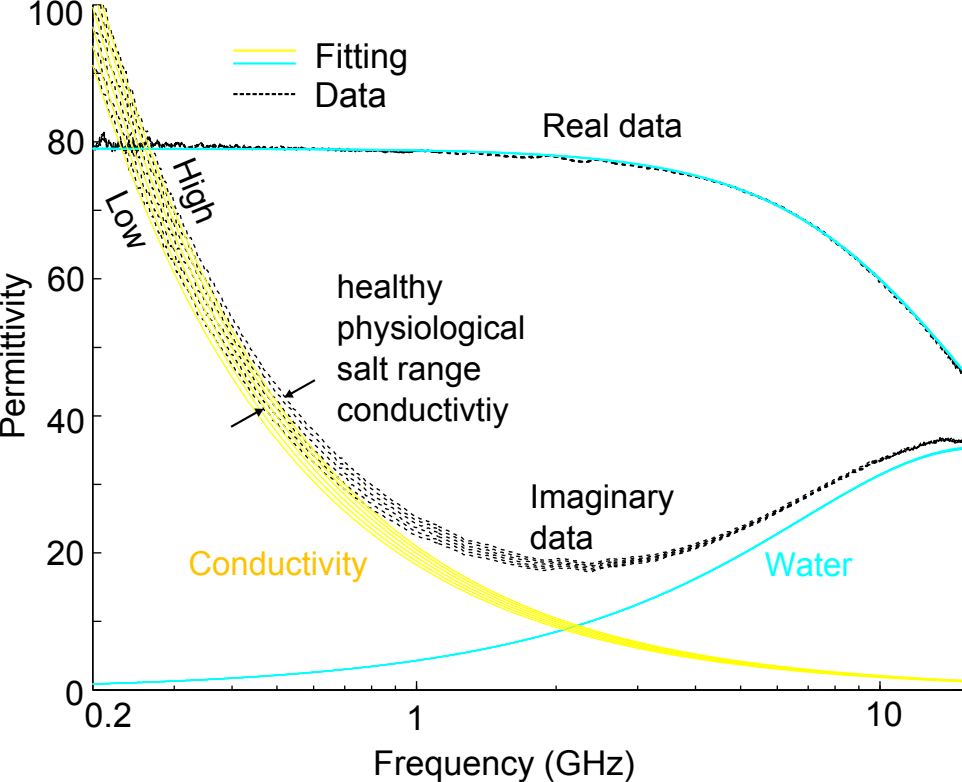

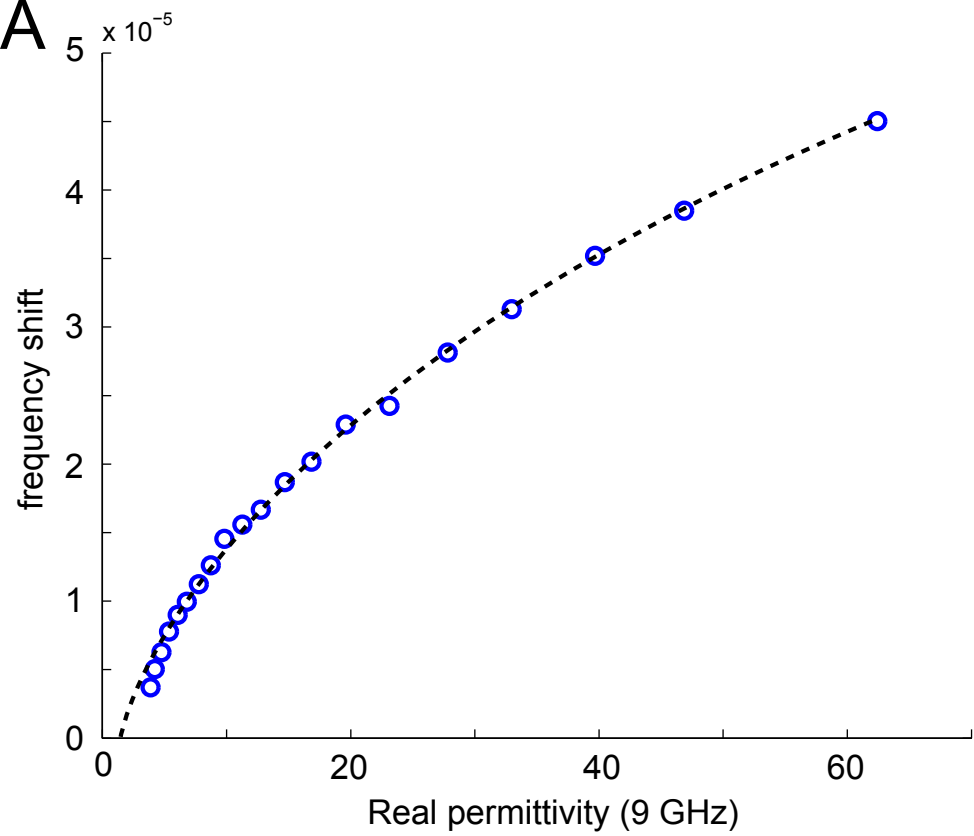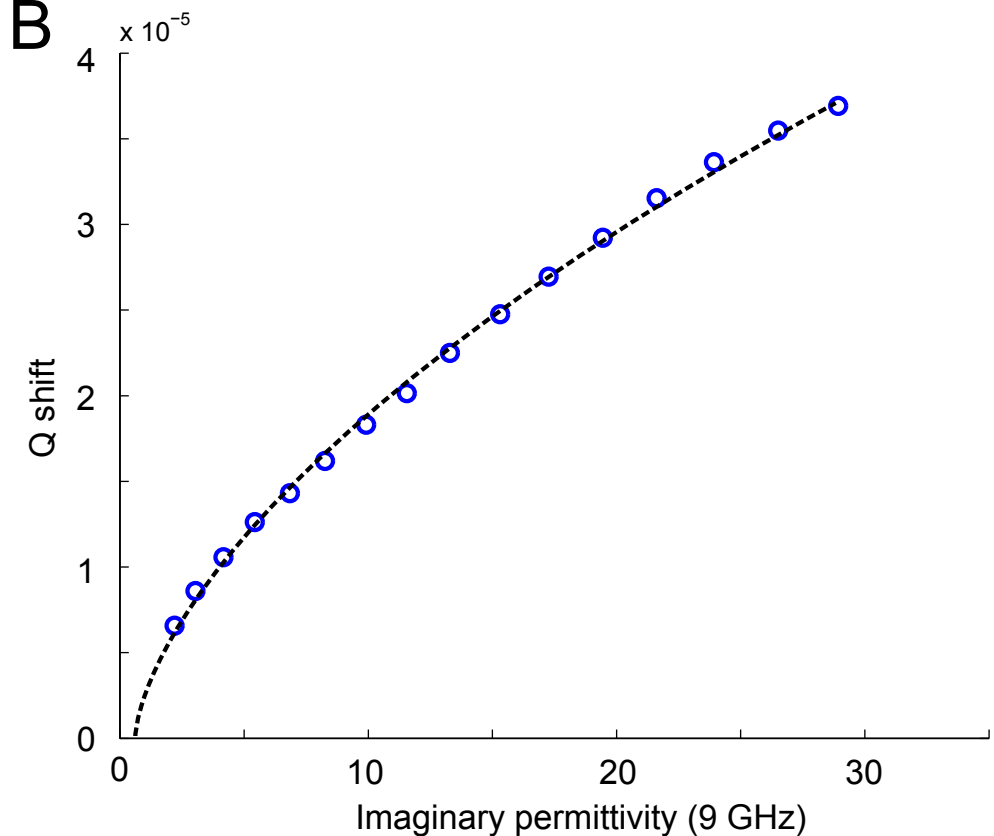

Supplement: NIHMS67856-supplement-Supporting_Information.pdf [file NIHMS67856-supplement-Supporting_Information.pdf]
